# Supplementary material for: High performance solution-processed green phosphorescent organic light-emitting diodes with high current efficiency and long-term stability
Source: Royal Society of Chemistry journal article supplement (doi:10.1039/c9tc03559a), 2019-01-01
Supplement: c9tc03559a1.pdf [file c9tc03559a1.pdf]

## **Supporting Information**

### **High performance solution-processed green phosphorescent organic light-emitting diodes with high current efficiency and long-term stability**

Athithan Maheshwaran,<sup>a</sup> Vijaya Gopalan Sree,<sup>a</sup> Ho-Yeol Park,<sup>a</sup> Woosum Cho,<sup>a</sup> Hyein Kim,<sup>a</sup> Raja Kumaresan,<sup>a</sup> Youngkwang Kim,<sup>b</sup> Jae Chol Lee,<sup>b</sup> Myungkwan Song,<sup>c\*</sup> and Sung-Ho Jin,<sup>a\*</sup>

A. Maheshwaran, Dr. V. G. Sree, H. Kim, H.-Y. Park, Dr. W. Cho, H. Kim, R. Kumaresan, Prof. S.-H. Jin

<sup>a</sup>Department of Chemistry Education, Graduate Department of Chemical Materials, Institute for Plastic Information and Energy Materials, Pusan National University, Busandaehakro 63-2, Busan 46241, Republic of Korea

E-mail: [shjin@pusan.ac.kr](mailto:shjin@pusan.ac.kr)

Y. Kim, Dr. J. C. Lee

<sup>b</sup>LG Display E6 Block LG Science Park 30, Magokjungang 10-ro, Gangseo-gu, Seoul 07796, Republic of Korea

Dr. M. Song

<sup>c</sup>Advanced Functional Thin Films Department Surface Technology Division Korea Institute of Materials Science (KIMS) 797 Changwondaero, Changwon, Gyeongnam 51508, Republic of Korea E-mail: [smk1017@kims.re.kr](mailto:smk1017@kims.re.kr)

## **Theoretical Computation**

DFT calculations were performed for both Ir(III) complexes and host molecules. Non-metal atoms of C, H, N, F, P and O were described by the all-electron basis set of B3LYP/6-31G (d). The effective core potentials with a B3LYP/LanL2DZ basis set were used for Ir atoms. Both ground and excited state calculations were performed for all molecules. The excitation behaviors of the complexes were computed by time-dependent DFT (TD-DFT) method based on optimized geometries at the ground states. All calculations were carried out by using the Gaussian 09 program.

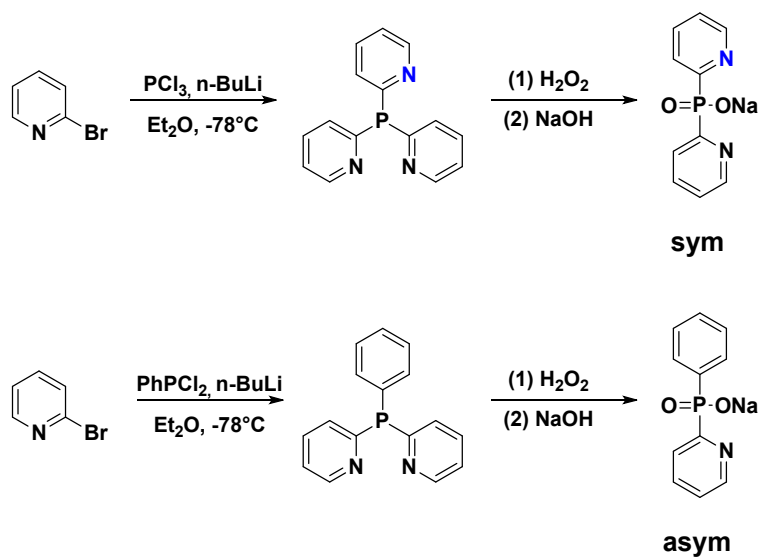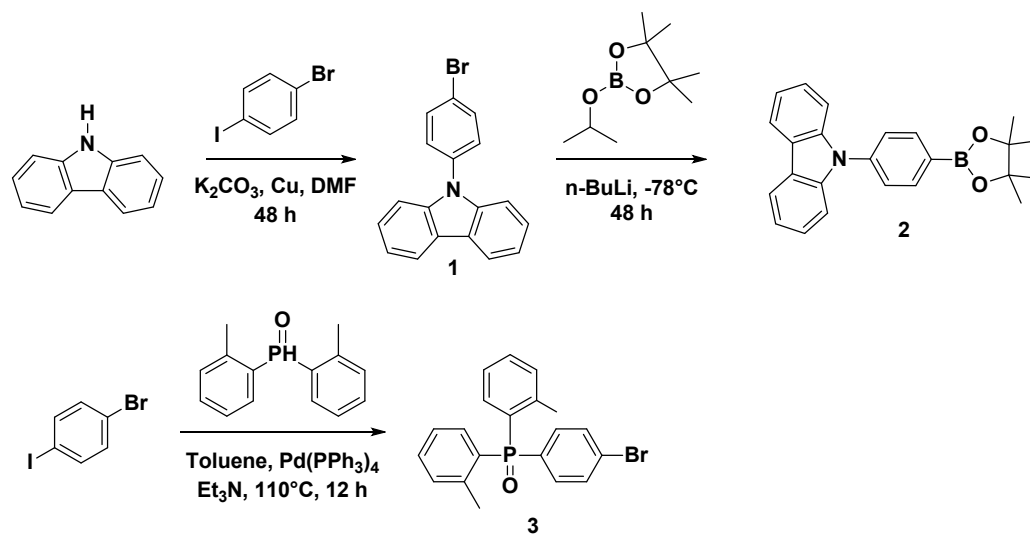

**Scheme S1.** Synthetic routes of ancillary ligands and *m*-CBPPO1 intermediates.

sym-1H NMR  
sym-1HNMR

9.51  
8.66  
8.33  
8.16  
8.06  
7.84  
7.75  
7.72  
7.65  
7.56  
7.46  
7.25  
6.64  
6.50  
6.42

1.98  
1.76  
1.42  
1.41  
1.38  
1.33  
1.29  
1.24  
0.97  
0.95  
0.88  
0.86  
0.84

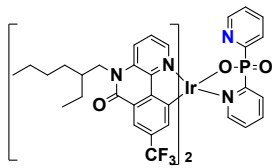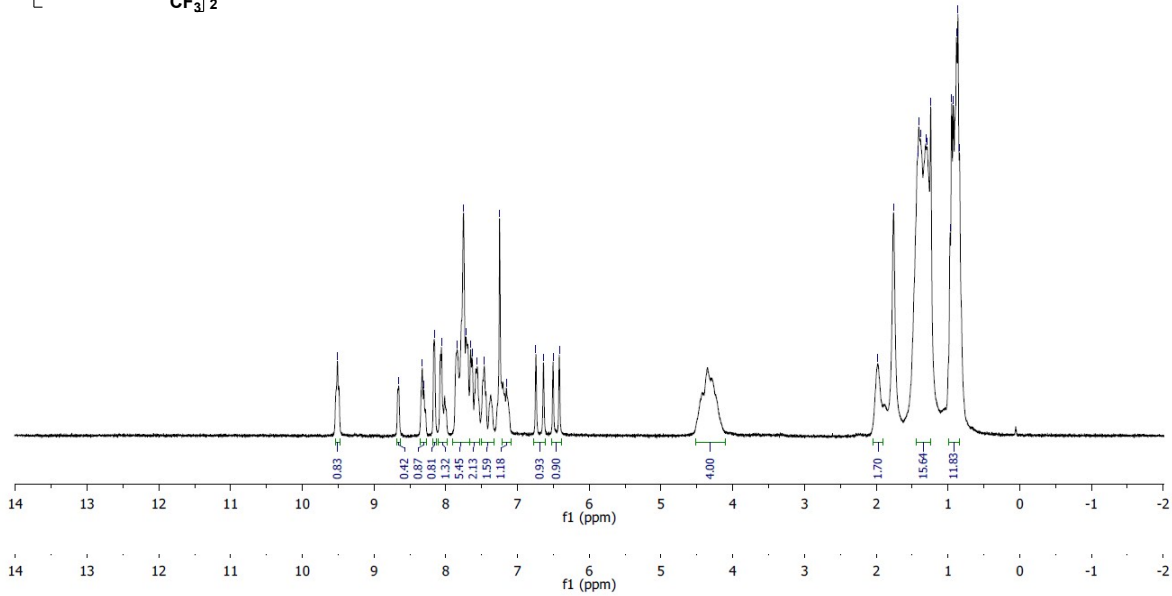

asym-1HNMR  
asym-1HNMR

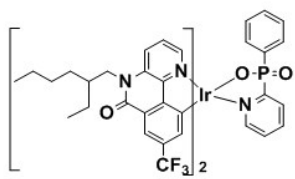

9.62  
8.61  
8.17  
7.80  
7.77  
7.71  
7.33  
7.25  
7.22  
7.21  
7.16  
7.15  
6.69  
6.54

4.43  
4.34

1.06  
1.05  
1.04  
1.00  
1.38  
1.24  
1.10  
1.06  
1.04  
1.01  
0.97  
0.85

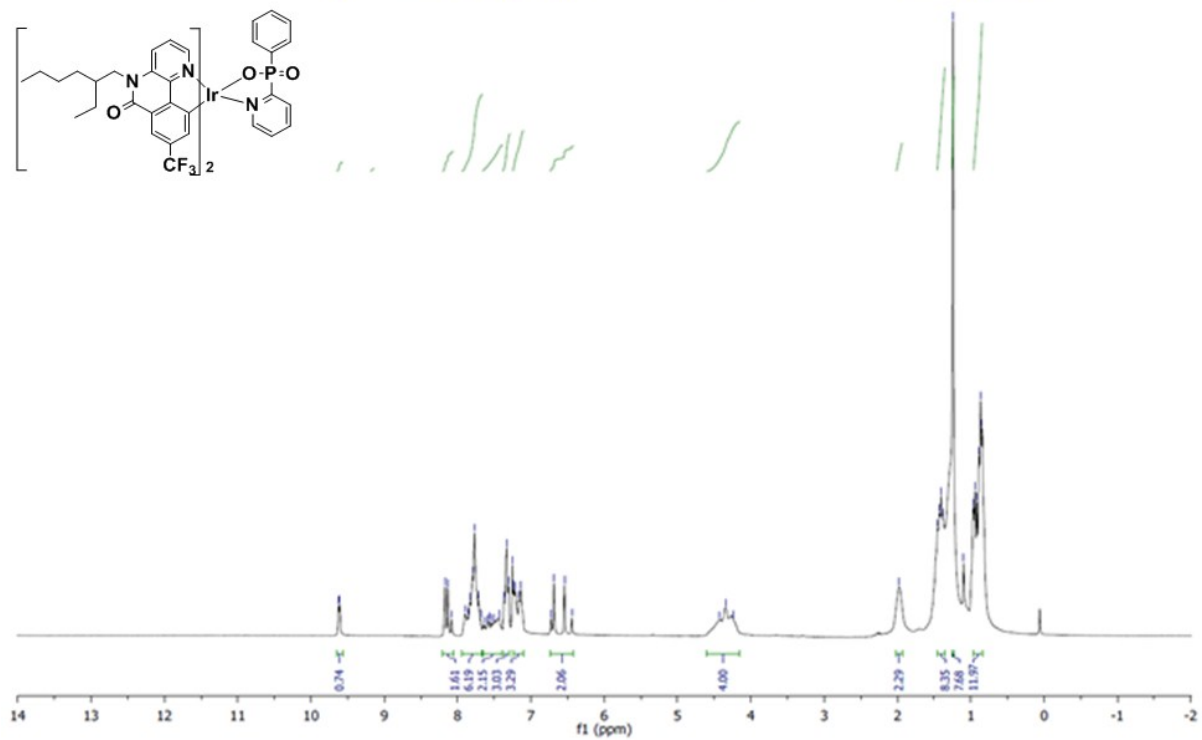

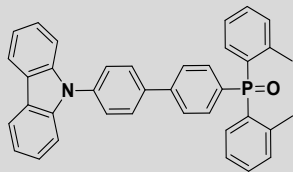

[Mass Spectrum]  
Data: Syn-C32H52F8N6O4P-HRFAB Date: 12-Sep-2018 10:24  
Instrument: MStation  
Sample: -  
Inlet: Direct Ion Mode: FAB+  
Spectrum Type: Normal Ion [EF-Linear]

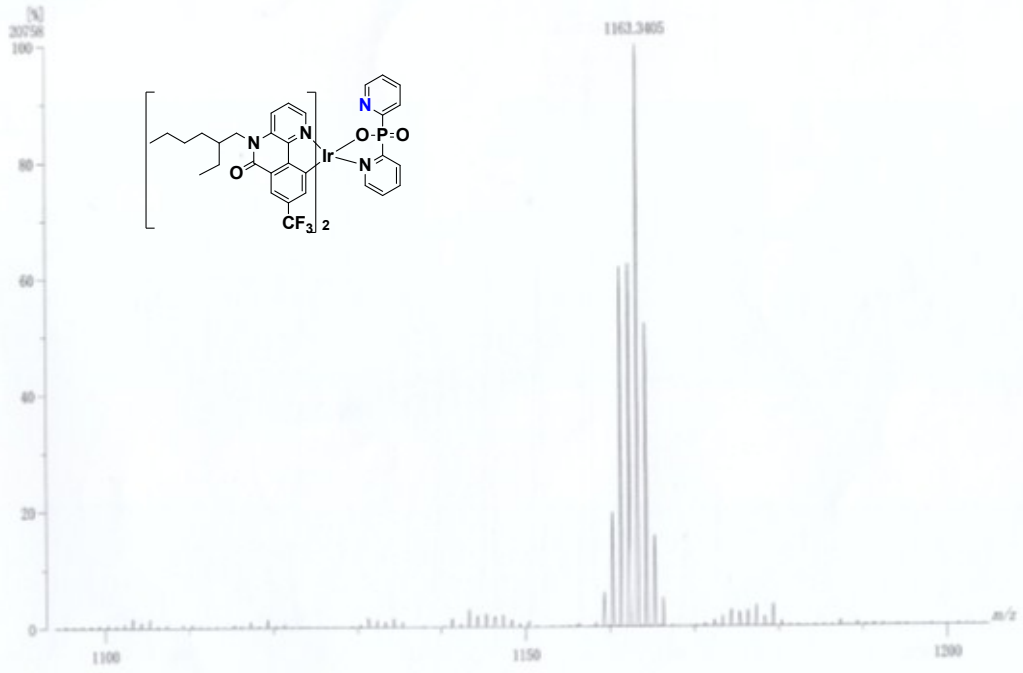

[ Mass Spectrum ]  
Data : Asym-C53H53F9IrNO4P-HRFAB Date : 12-Sep-2018 10:38  
Instrument : MStation  
Sample : -  
Met : Direct Ion Mode : FAB+  
Spectrum Type : Normal Ion [EF-Linear]

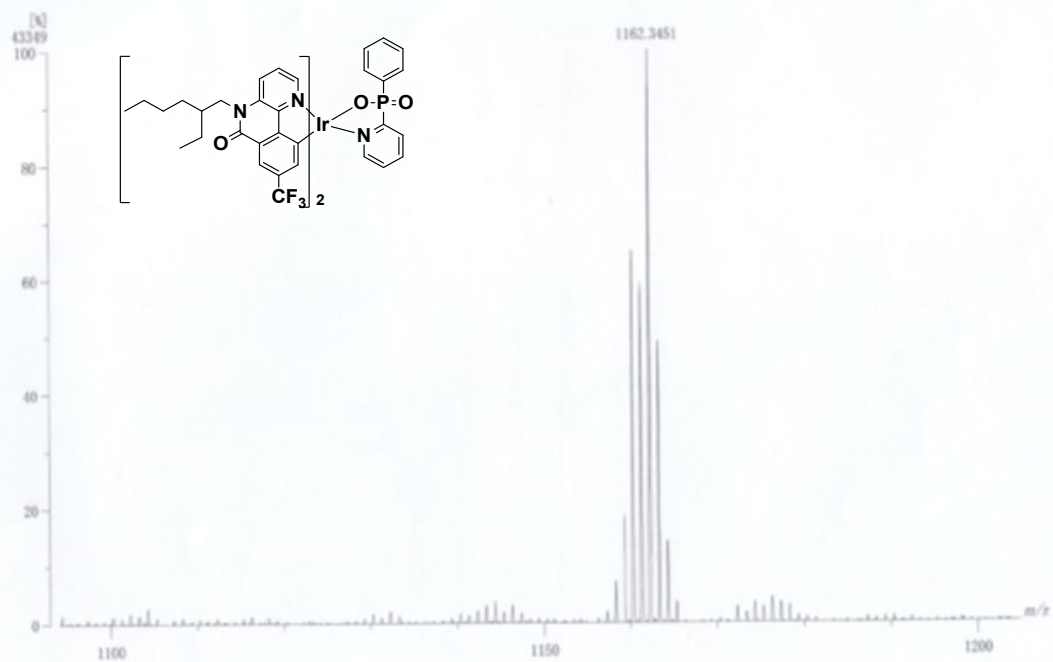

**Fig. S1.** <sup>1</sup>H NMR and mass spectra of sym-Ir1, asym-Ir2 and *m*-CBPPO1.



Sample Info : Ir(dpp)

Additional Info : Peak(s) manually integrated

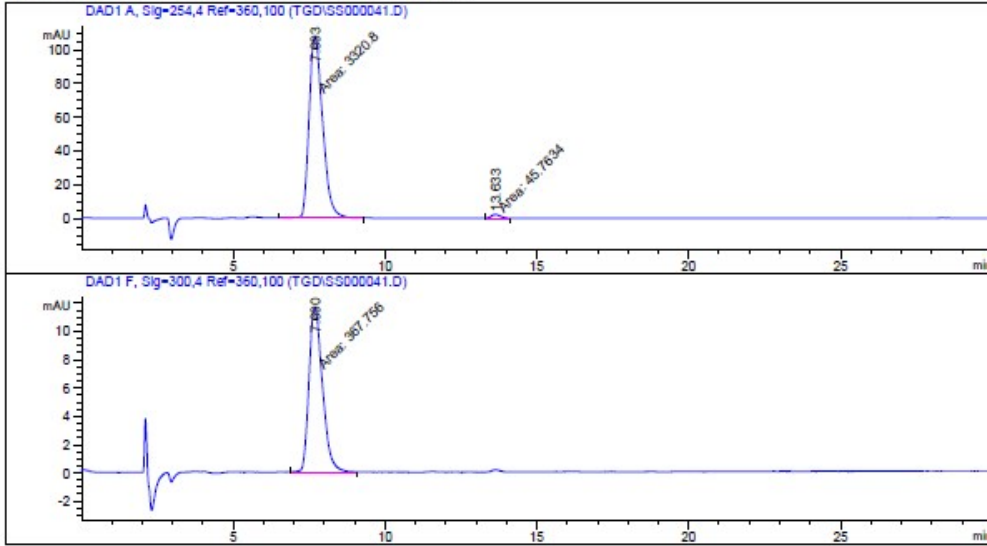

=====  
Area Percent Report  
=====

Sorted By : Signal  
Multiplier: : 1.0000  
Dilution: : 1.0000  
Use Multiplier & Dilution Factor with ISTDs

Signal 1: DAD1 A, Sig=254,4 Ref=360,100

| Peak #   | RetTime [min] | Type | Width [min] | Area [mAU*s] | Height [mAU] | Area %  |
|----------|---------------|------|-------------|--------------|--------------|---------|
| 1        | 7.693         | MM   | 0.5155      | 3320.80127   | 107.37209    | 98.6407 |
| 2        | 13.633        | MM   | 0.3373      | 45.76337     | 2.26142      | 1.3593  |
| Totals : |               |      |             | 3366.56464   | 109.63352    |         |

Signal 2: DAD1 F, Sig=300,4 Ref=360,100

| Peak #   | RetTime [min] | Type | Width [min] | Area [mAU*s] | Height [mAU] | Area %   |
|----------|---------------|------|-------------|--------------|--------------|----------|
| 1        | 7.690         | MM   | 0.5243      | 367.75620    | 11.69084     | 100.0000 |
| Totals : |               |      |             | 367.75620    | 11.69084     |          |

Sample Info : Ir(ppp) in THF

Additional Info : Peak(s) manually integrated

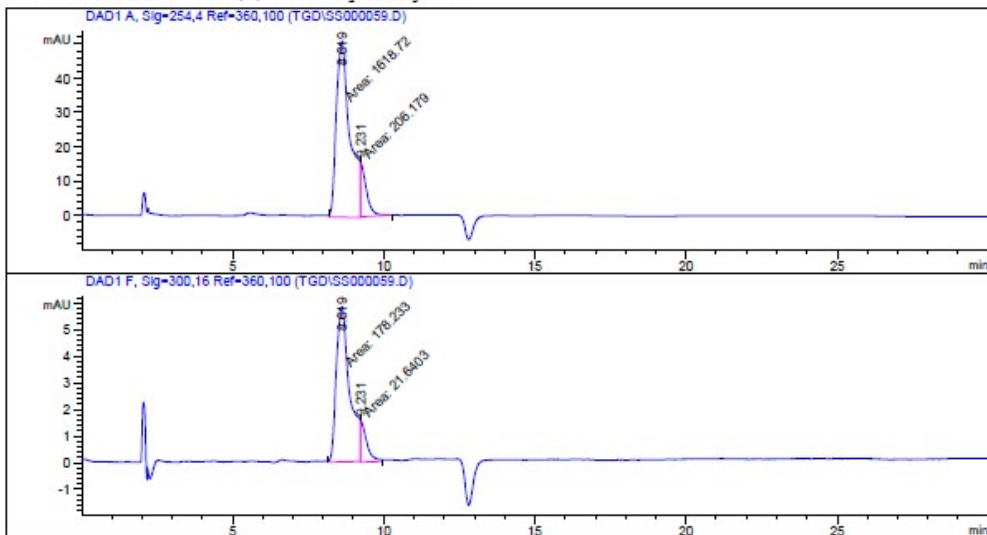

=====  
Area Percent Report  
=====

Sorted By : Signal  
Multiplier: : 1.0000  
Dilution: : 1.0000  
Use Multiplier & Dilution Factor with ISTDs

Signal 1: DAD1 A, Sig=254,4 Ref=360,100

| Peak #   | RetTime [min] | Type | Width [min] | Area [mAU*s] | Height [mAU] | Area %  |
|----------|---------------|------|-------------|--------------|--------------|---------|
| 1        | 8.619         | MM   | 0.8269      | 1618.72363   | 51.20451     | 88.7019 |
| 2        | 9.231         | MM   | 0.2130      | 206.17944    | 16.13075     | 11.2981 |
| Totals : |               |      |             | 1824.90308   | 67.33526     |         |

Signal 2: DAD1 F, Sig=300,16 Ref=360,100

| Peak #   | RetTime [min] | Type | Width [min] | Area [mAU*s] | Height [mAU] | Area %  |
|----------|---------------|------|-------------|--------------|--------------|---------|
| 1        | 8.619         | MM   | 0.8102      | 178.23302    | 5.82273      | 89.1730 |
| 2        | 9.231         | MM   | 0.2253      | 21.64027     | 1.60097      | 10.8270 |
| Totals : |               |      |             | 199.87329    | 7.42370      |         |

Fig. S2. HPLC chromatograms of sym-Ir1 and asym-Ir2.

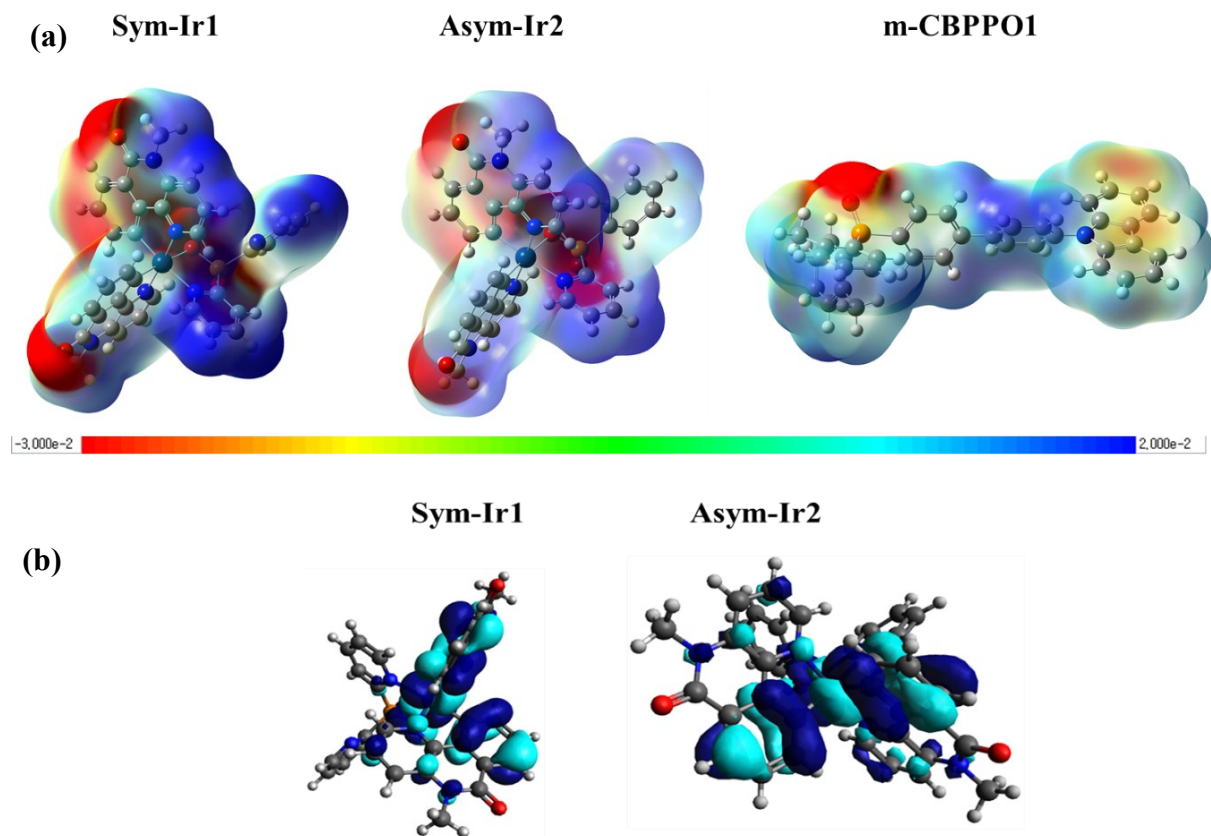

**Fi**  
**g. S3.** (a) Calculated electrostatic surface potentials of Ir(III) complexes and *m*-CBPPO1 and, (b)  $E_T$  state visualization of sym-Ir1 and asym-Ir2 complexes.

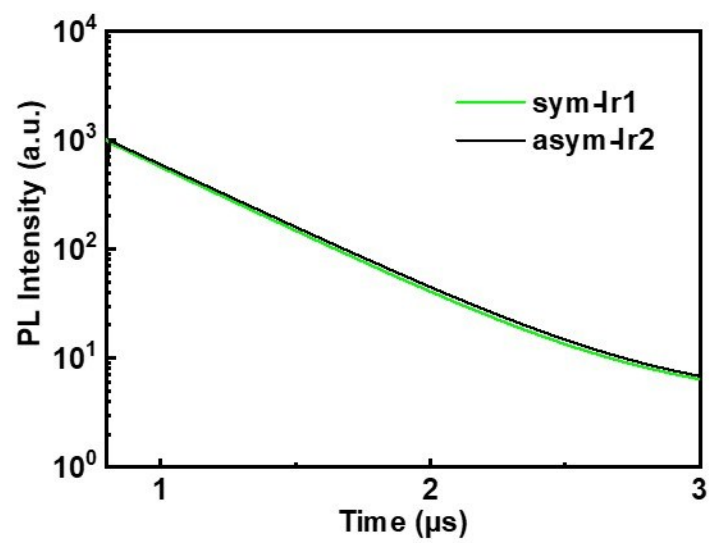

**Fig. S4.** PL decay curves measured for sym-Ir1 and asym-Ir2 in  $\text{CH}_2\text{Cl}_2$  solution ( $1 \times 10^{-4}\text{M}$ ) upon  $\text{N}_2$  purging.

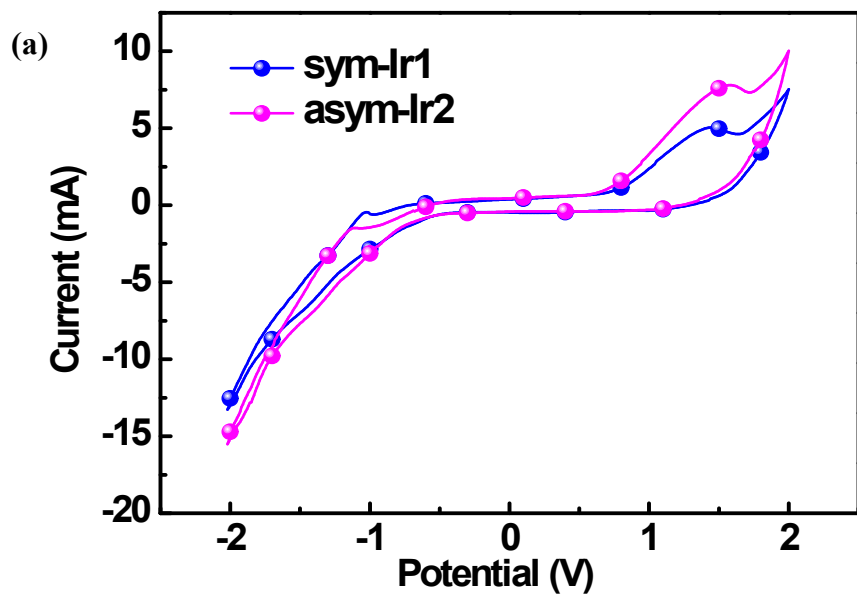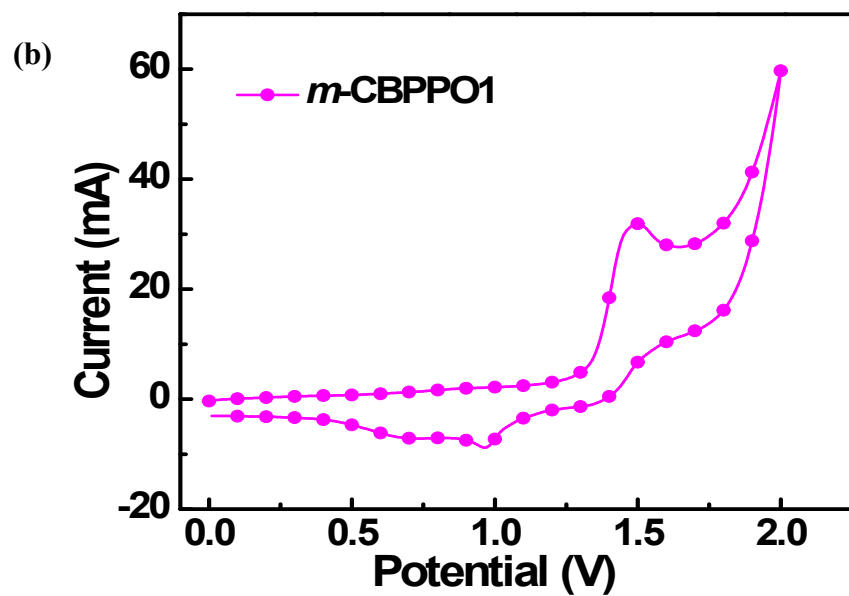

Fig. S5. Cyclic voltammograms of (a) sym-Ir1, asym-Ir2 and (b) *m*-CBPPO1.

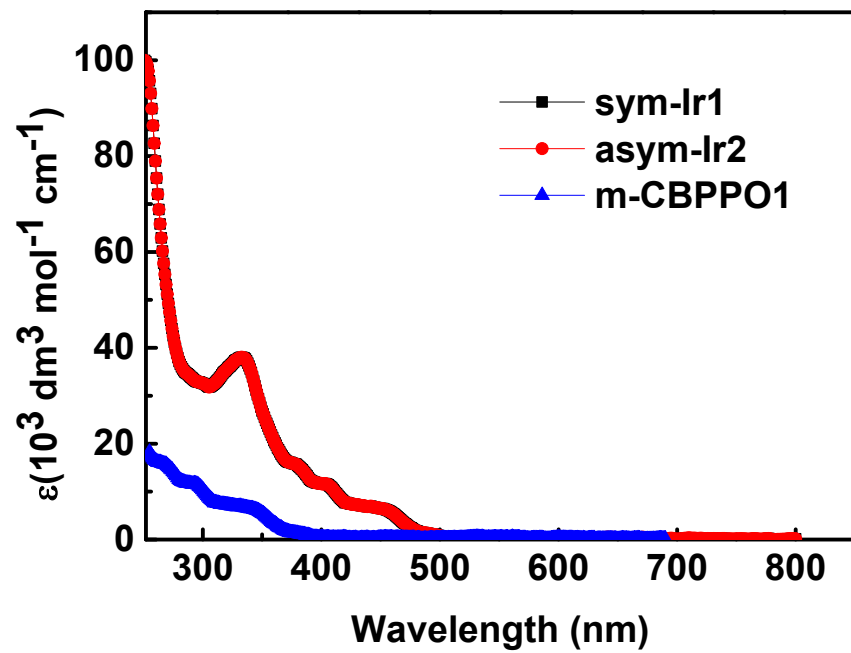

Fig. S6. Absorption coefficient spectra for sym-Ir1, asym-Ir2 and m-CBPP01.

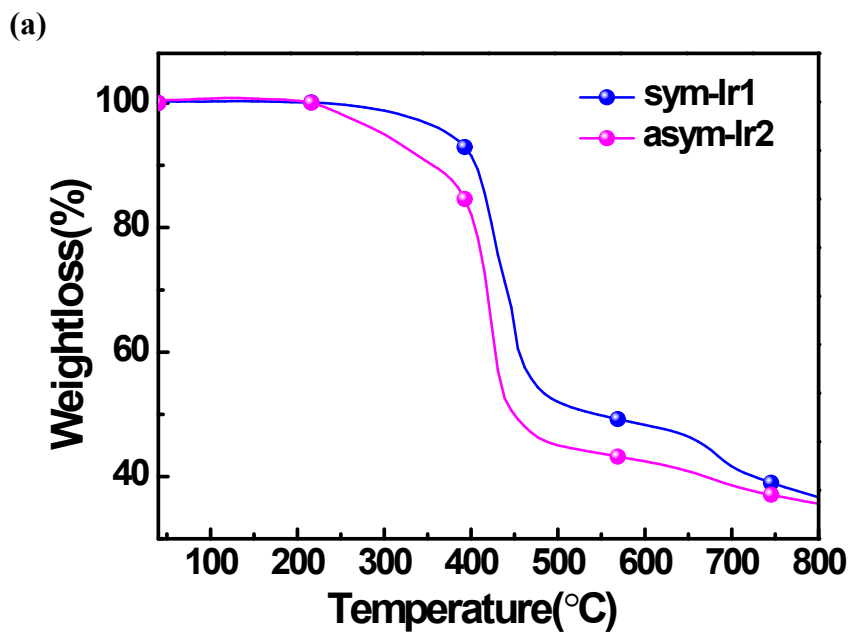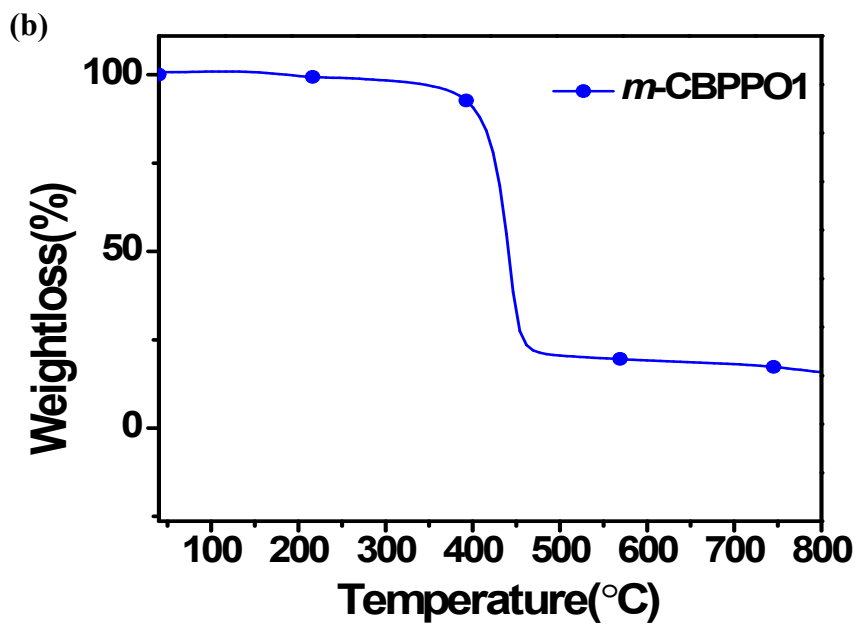

Fig. S7. TGA analysis of (a) sym-Ir1, asym-Ir2 and (b) *m*-CBPPO1.

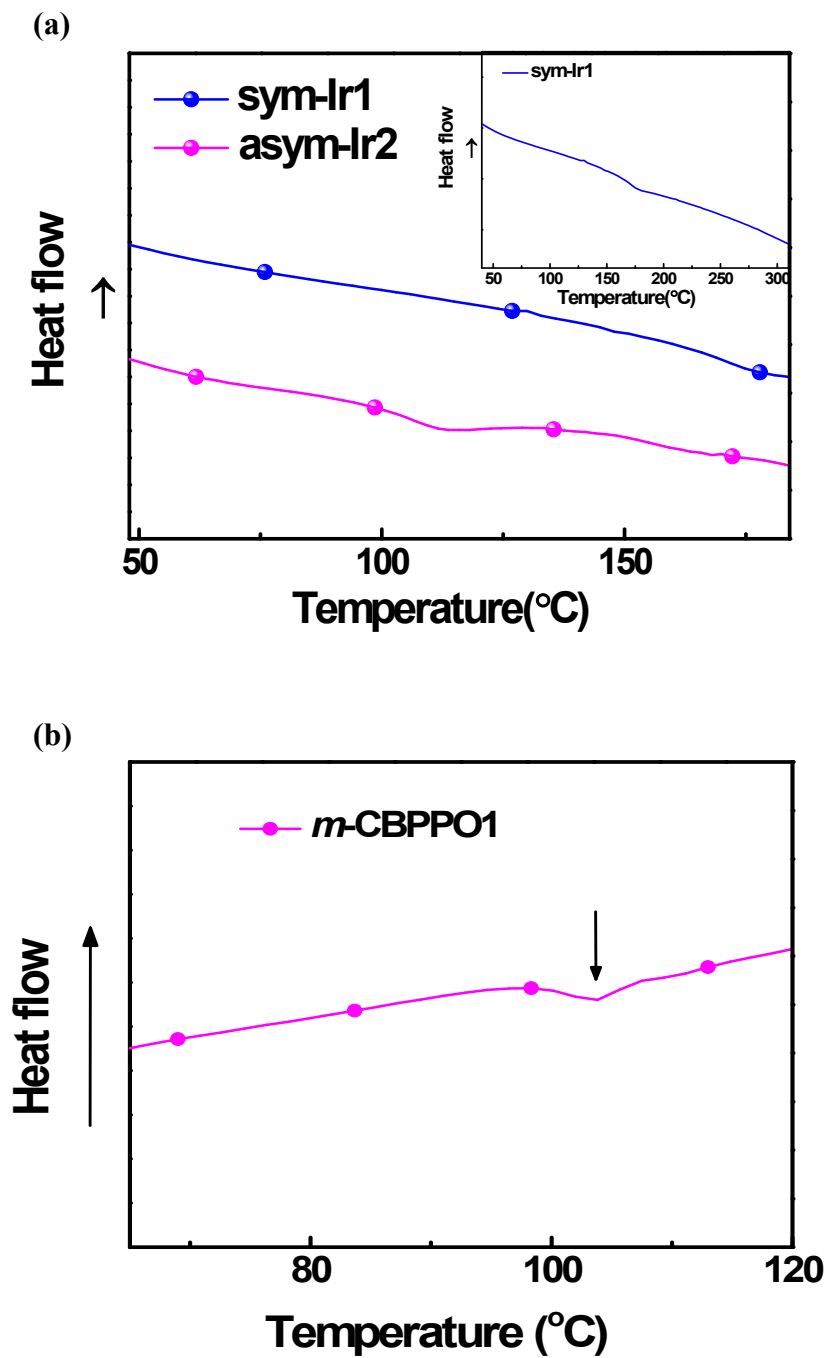

Fig. S8. DSC analysis of (a) sym-Ir1, asym-Ir2 (insert showing the  $T_g$  of sym-Ir1) and (b) *m*-CBPPO1 at a heating rate of  $10\text{ }^\circ\text{C min}^{-1}$ .



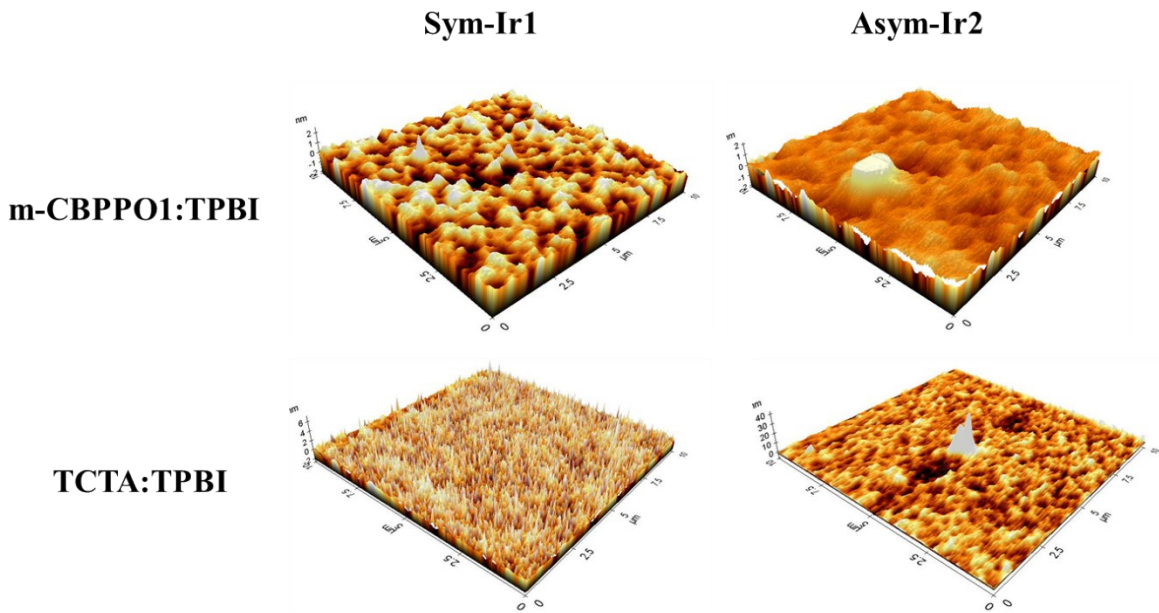

**Fig. S9.** Surface morphologies (3D images) of solution processed films.

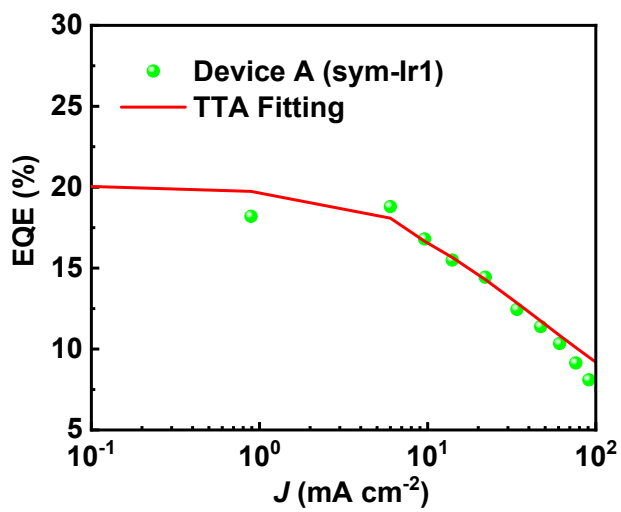

**Fig. S10.** EQE-current density (EQE- $J$ ) dependence of devices with complex sym-Ir1. The solid lines stand for the TTA fitting curve.

(a)

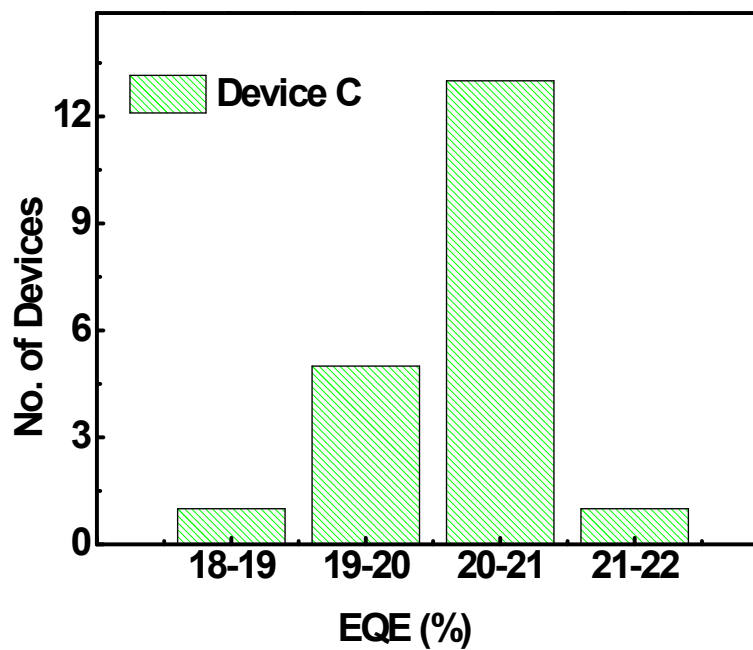

(b)

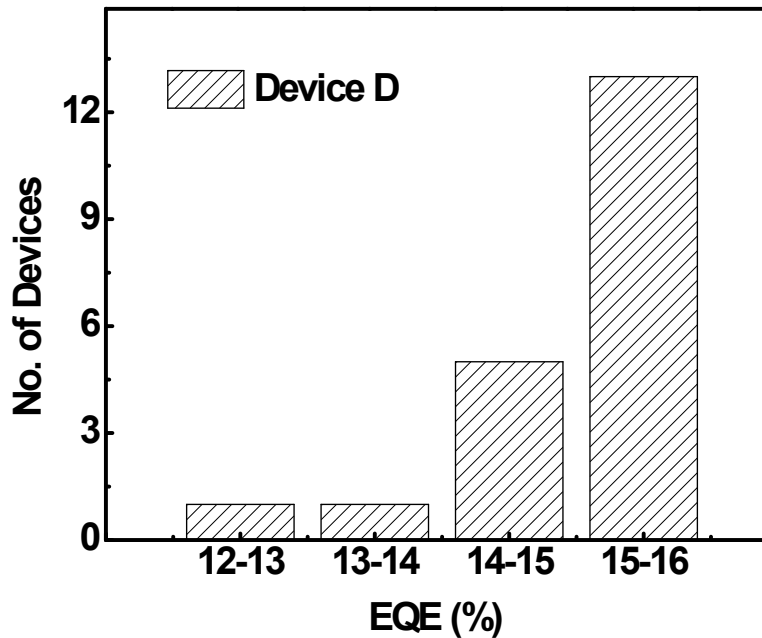

Fig. S11. Repeatability of the devices fabricated using the optimized structure using complexes

(a)

sym-Ir1

and

(b)

asym-Ir2.

**Table S1** Literature summary of phosphine oxide functionalized Ir(III) complexes for PHOLEDs

| Dopant                                    | EQE <sub>max</sub> (%) | CE <sub>max</sub> (cd/A) | Devicie fabrication     | Host                                 | Reference        |
|-------------------------------------------|------------------------|--------------------------|-------------------------|--------------------------------------|------------------|
| <b>Sym-Ir1<br/>(green)</b>                | 20.82                  | <b>68.72</b>             | <b>Solution process</b> | <b>m-CBPPO1(New<br/>host) / TPBi</b> | <b>This work</b> |
| Ir3 (green)                               | 19.40                  | 85.31                    | Solution-process        | TCTA/TPBi                            | 1                |
| Ir2 (Deep-blue)                           | 3.8                    | 4.3                      | Vaccum-process          | TSPO1                                | 2                |
| G2 (green)                                | 19.8                   | 60.6                     | Vaccum-process          | -                                    | 3                |
| DPP-2 (blue)                              | 28.3                   | 58.78                    | Vaccum-process          | -                                    | 4                |
| Ir-PO (green)                             | 9.67                   | 34.23                    | Vaccum-process          | -                                    | 5                |
| PO-Firpic (blue)                          | 7.1                    | 11.1                     | Solution-process        | PVK/OXD                              | 6                |
| Ir(tfmppy) <sub>2</sub><br>(tpip) (green) | -                      | 67.95                    | Vaccum-process          | mCP                                  | 7                |
| G2 (green)                                | -                      | 113.23                   | Vaccum-process          | mCP                                  | 8                |
| Ir(tfmppy) <sub>2</sub><br>(tpip) (green) | 21.9                   | 83.53                    | Vaccum-process          | D-QDPO (new<br>host)                 | 9                |
| G4 (green)                                | -                      | 50.8                     | Vaccum-process          | SimCP2                               | 10               |
| G4 (green)                                | 29.5                   | 92.83                    | Vaccum-process          | PPO21                                | 11               |
| Ir(dfptfmpm)<br>tpip (green)              | -                      | 54.29                    | Vaccum-process          | mCP                                  | 12               |

## References

1. V. G. Sree, A. Maheshwaran, H. Kim, H-Y. Park, Y. Kim, J. C. Lee, M. Song, S-H. Jin, *Adv. Funct. Mater.*, 2018, **28**, 1804714.
2. G. Sarada, A. Maheshwaran, W. Cho, T. Lee, S. H. Han, J. Y. Lee, S-H. Jin, *Dyes Pigm.*, 2018, **150**, 8.
3. F. Zhang, W. Li, Y. Yu, Y. Jing, D. Ma, F. Zhang, S. Li, G. Cao, Z. Li, G. Guo, B. Wei, D. Zhang, L. Duan, C. Li, Y. Feng, B. Zhai, *J. Mater. Chem. C*, 2016, **4**, 5475.
4. Z-G. Wu, Y-M. Jing, G-Z. Lu, J. Zhou, Y-X. Zheng, L. Zhou, Y. Wang, Y. Pan, *Sci. Rep.* DOI: 10.1038/srep38478
5. G. Zhou, Q. Wang, C-L. Ho, W-Y. Wong, D. Ma, L. Wang, Z. Lin, *Chem. Asian J.*, 2008, **3**, 1841
6. C. Fan, Y. Li, C. Yang, H. Wu, J. Qin, Y. Cao, *Chem. Mater.*, 2012, **24**, 4587.
7. Y-C. Zhu, L. Zhou, H-Y. Li, Q-L. Xu, M-Y. Teng, Y-X. Zheng, J-L. Zuo, H-J. Zhang, X-Z. You, *Adv. Mater.*, 2011, **23**, 4046.
8. H-Y. Li, L. Zhou, M-Y. Teng, Q-L. Xu, C. Lin, Y-X. Zheng, J-L. Zuo, H-J. Zhang, X-Z. You, *J. Mater. Chem. C*, 2013, **1**, 565.
9. Z- G. Wu, J. Zhou, L. Yu, G. Karotsis, Y. Wang, Y-X. Zheng, Y. Pan, *J. Mater. Chem. C*, 2017, **5**, 8579.
10. Q-L. Xu, C-C. Wang, T-Y. Li, M-Y. Teng, S. Zhang, Y-M. Jing, X. Yang, W-N. Li, C. Lin, Y-X. Zheng, J-L. Zuo, X-Z. You, *Inorg. Chem.*, 2013, **52**, 4916.
11. H-B. Han, Z-L. Tu, Z-G. Wu, Y-X. Zheng, *Dyes Pigm.* DOI:10.1016/j.dyepig.2018.09.017.
12. Y-H. Zhou, J. Xu, Z-G. Wu, Y-X. Zheng, *J. Organomet. Chem.*, 2017, **848**, 231.

**Table S2.** Theoretical calculation results for symmetric and asymmetric Ir(III) complexes.

| <b>Complex</b> | <b>State</b> | <b><math>\lambda_{cal}</math> [nm]</b> | <b>f</b> | <b>Composition</b> | <b>Assignments</b>    |
|----------------|--------------|----------------------------------------|----------|--------------------|-----------------------|
| sym-Ir1        | T1           | 504                                    |          | H→L [92.7]         | MLCT/LLCT/ $\pi\pi^*$ |
|                | S1           |                                        | 0.016    | H→L [96.9]         | MLCT/LLCT/ $\pi\pi^*$ |
| asym-Ir2       | T1           | 506                                    |          | H→L [91.1]         | MLCT/LLCT/ $\pi\pi^*$ |
|                | S1           |                                        | 0.009    | H→L [97.2]         | MLCT/LLCT/ $\pi\pi^*$ |

<sup>a</sup>H→L represents the HOMO to LUMO transition. f stands for oscillator strength.

**Table S3.** Absorption coefficients for sym-Ir1, asym-Ir2 and m-CBPPO1.

| <b>Complex</b>   | <b>absorption<sup>a</sup></b>                                                                                  |
|------------------|----------------------------------------------------------------------------------------------------------------|
|                  | <b><math>\lambda</math> (nm) {<math>\epsilon</math>, <math>10^3</math> L mol<sup>-1</sup> cm<sup>-1</sup>}</b> |
| sym-Ir1          | 333 (38.1), 379 (15.4), 405 (11.4), 453 (6.2)                                                                  |
| sym-Ir2          | 334 (42.9), 404 (12.0), 454 (7.6)                                                                              |
| <i>m</i> -CBPPO1 | 293 (53.3), 319 (46.1)                                                                                         |

<sup>a</sup>Absorption measurements of complexes were taken in CH<sub>2</sub>Cl<sub>2</sub>.

| Time<br>(Hours) | EQE_C<br>(%) | EQE_D<br>(%) | Luminance_C<br>(cd m <sup>-2</sup> ) | Luminance_D<br>(cd m <sup>-2</sup> ) |
|-----------------|--------------|--------------|--------------------------------------|--------------------------------------|
| 0               | 18.2         | 15.2         | 351.45                               | 302.48                               |
| 50              | 15.14        | 11.23        | 310.11                               | 257.42                               |
| 100             | 14.26        | 10.18        | 265.44                               | 199.57                               |
| 150             | 13.76        | 9.59         | 254.59                               | 185.29                               |
| 200             | 13.47        | 9.29         | 249.32                               | 177.51                               |
| 250             | 13.15        | 8.93         | 242.97                               | 168.97                               |
| 300             | 12.83        | 8.59         | 236.62                               | 160.83                               |
| 350             | 12.54        | 8.27         | 229.87                               | 155.25                               |
| 400             | 12.28        | 8.00         | 225.16                               | 149.79                               |

**Table S4.** EQE and luminance values for devices C and D at regular intervals.

Stability of the devices measured at 10 mA cm<sup>-2</sup>.
